# Supplementary material
Source: PubMed Central journal article supplement (PMC6602409)
Supplement: am8b21398_si_001.pdf [file am8b21398_si_001.pdf]

## SUPPLEMENTARY INFORMATION

Lipid-mRNA Nanoparticle Designed To Enhance Intracellular Delivery Mediated By Shock Waves

Jing Zhang †+, Shamit Shrivastava ‡+, Robin O. Cleveland ‡\*, Terence H. Rabbitts † \*  
+ equal contribution authors

† MRC Molecular Haematology Unit, MRC Weatherall Institute of Molecular Medicine, Radcliffe Department of Medicine, University of Oxford, John Radcliffe Hospital, Oxford. OX3 9DS, UK

‡ Institute of Biomedical Engineering, University of Oxford, Old Road Campus Research Building, Oxford OX3 7DQ, UK

Contributing authors email: [terence.rabbitts@imm.ox.ac.uk](mailto:terence.rabbitts@imm.ox.ac.uk), [robin.cleveland@eng.ox.ac.uk](mailto:robin.cleveland@eng.ox.ac.uk)

### Supplementary Information Index

**Figure S1.** mRNA Delivery Using Different Formulations Of LNP.

**Figure S2.** mRNA Is Intact In The LNP<sub>LH</sub>/ mRNA Lipoplex.

**Figure S3.** Comparison Of GFP Expression In A549 Cells Transfected With Native mRNA And Modified mRNA.

**Figure S1**

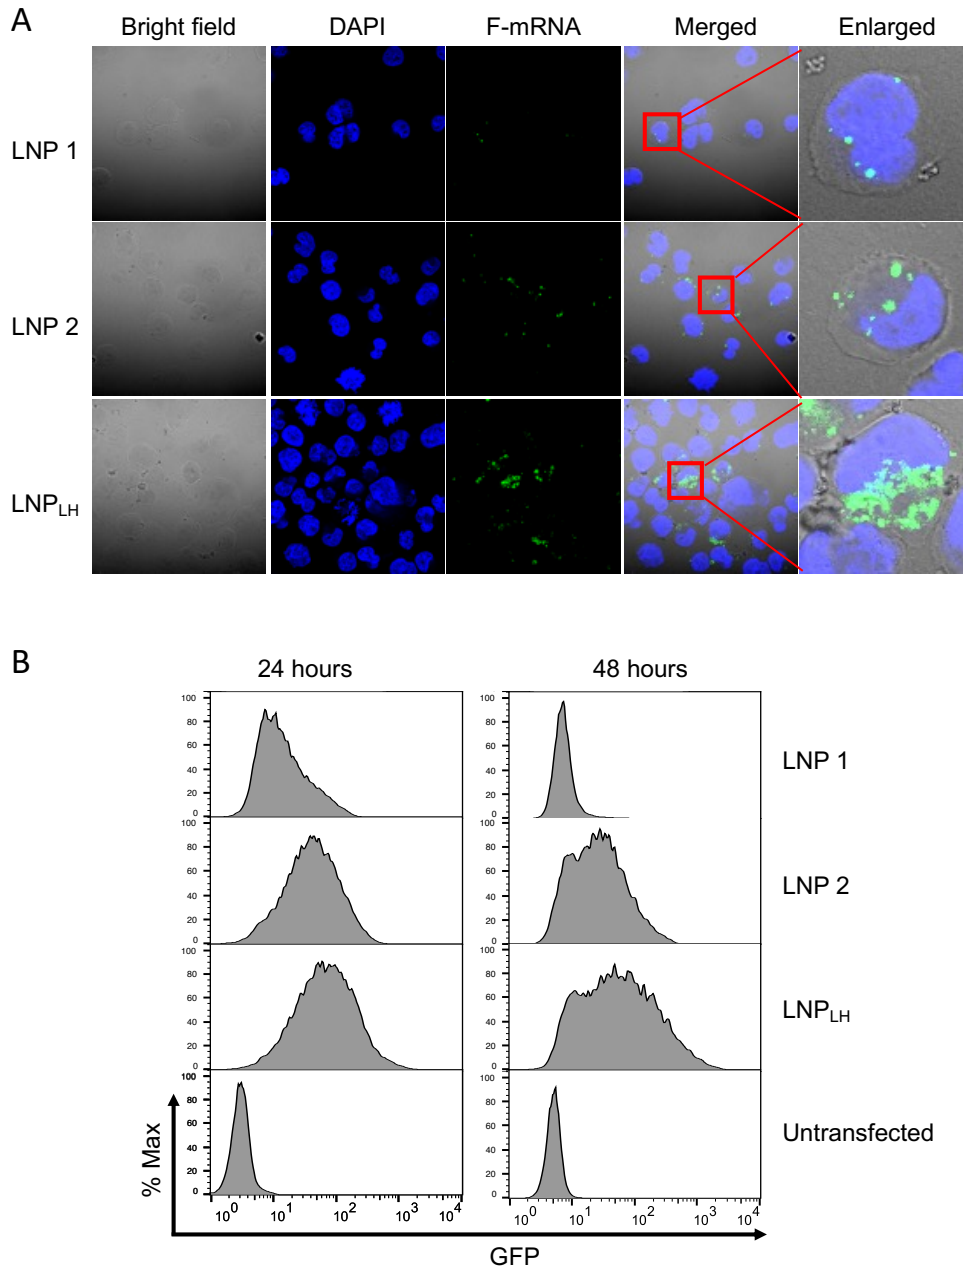

**Figure S1. mRNA Delivery Using Different Formulations Of LNP.**

A total of 600 ng of fluorescently labeled mRNA synthesised with fluorescein-UTP and ACAR cap were used to transfect 90,000 of HEK293T cells using LNP1, LNP2 or LNP<sub>LH</sub> at the mRNA:LNP ratio of 20:100 (w/w). The fluorescent signal from the transfected cells were analyzed 24 hours after transfection using confocal microscopy(A) or 24 and 48 hours after transfection using FACS (B).

**Figure S2**

| Sample     | H <sub>2</sub> O | Lipoplex | Luciferase Control RNA | Recovery 1 | Recovery 2 | mRNA |
|------------|------------------|----------|------------------------|------------|------------|------|
| Total mRNA | 0                | 0.3 µg   | 2 µg                   | 0.7 µg     | 2 µg       | 2 µg |

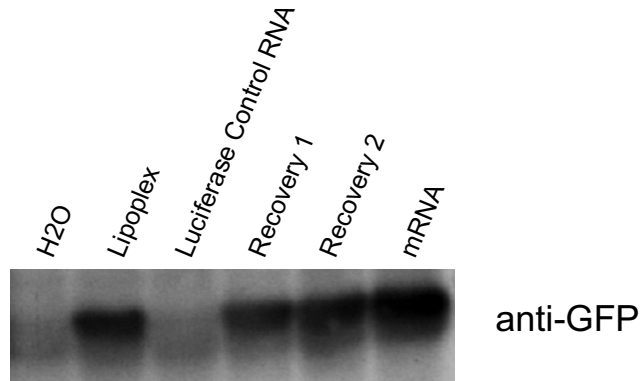

**Figure S2.** mRNA Is Intact In The LNP<sub>LH</sub>/mRNA Lipoplex.

The integrity of mRNA in the LNP complex was analyzed by extracting mRNA from LNP<sub>LH</sub>/mRNA lipoplex and testing in protein translation *in vitro* using a rabbit reticulocyte lysate system. A LNP<sub>LH</sub>/mRNA lipoplex (lipoplex made at mRNA:LNP<sub>LH</sub> ratio of 20:100 w/w) and the mRNA purified from the complex in duplicate (Recovery 1 and Recovery 2) using RNeasy Mini Kit (Qiagen 74104) were used as templates for protein translation in comparison to translation of starting mRNA and an mRNA-encoding luciferase. The amount of mRNA templates used for protein translation is indicated in the table. The translation reactions were fractionated by SDS-PAGE and western blotted with an anti-GFP antibody.

**Figure S3**

**A**

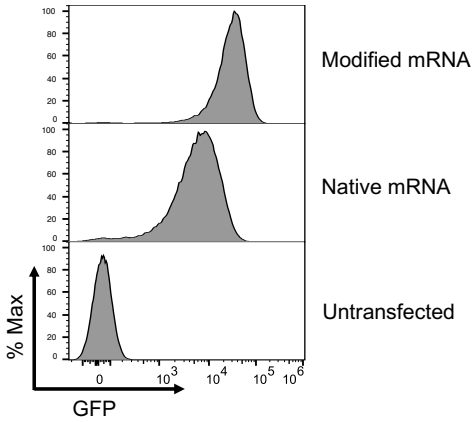

**B**

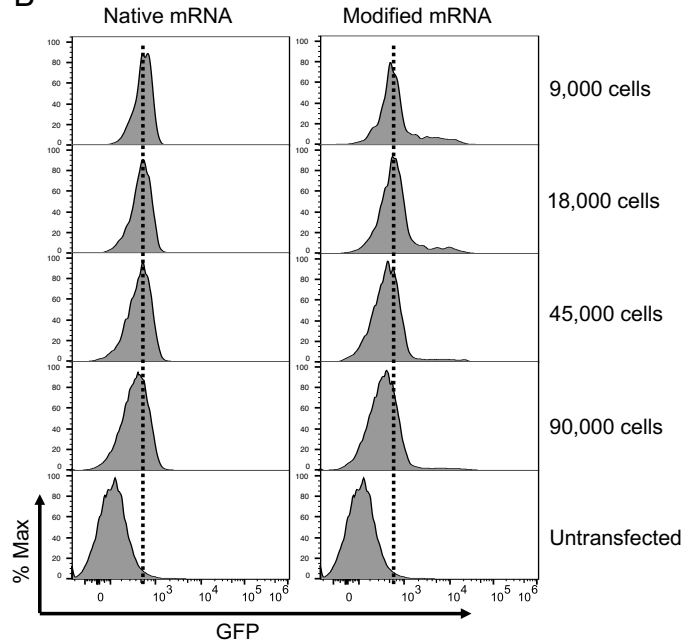

**Figure S3.** Comparison Of EGFP Expression In A549 Cells Transfected With Native mRNA And Modified mRNA.

A total of 600 ng of native mRNA or modified mRNA synthesized with pseudo-UTP and ACAR cap were used to transfected 90,000 of A549 cells using Lipofectamine 2000 (A) or 9,000 to 90,000 of A549 cells using LNP<sub>LH</sub> (B). The EGFP expression was tested by flow cytometry after 7 hours.
